# Supplementary material for: Degradation of chlorpyrifos and other pesticides by isolated bacteria under aerobic and anaerobic conditions
Source: Research Square preprint supplement (doi:10.21203/rs.3.rs-8476655/v1), 2026-01-08
Supplement: Supplementary file 1 [file 5e8fc03e5f18c1160e84e86e.docx]

**Table 1S.** Physicochemical parameters of soil and sediments.

| Parameters | Soil | | Sediment | |
| --- | --- | --- | --- | --- |
| Position 1 | Position 2 | Position 1 | Position 2 |
| Coordinates | 10°40' 58.93'' N,  105°7' 30.95'' E | 10°30' 57.78'' N  106° 0' 51.51'' E | 10°40' 59.91'' N,  105°7' 30.52'' E | 10° 30' 58.34'' N  106° 0' 41.64'' E |
| pH | 6.77±0.46 | 6.82±0.51 | 6.44±0.34 | 6.58±0.44 |
| Clay (%) | 33.2±2.55 | 35.1±3.04 | 22.6±1.67 | 20.5±1.37 |
| Silt (%) | 38.1±3.02 | 33.8±2.33 | 44.5±3.74 | 50.2±4.22 |
| Sand (%) | 33.8±2.71 | 37.1±3.34 | 32.9±2.26 | 29.3±2.08 |
| Total organic C (g/kg dw) | 17.34±1.37 | 20.38±1.63 | 37.76±2.04 | 46.21±3.71 |
| Total N (g/kg dw) | 1.15±0.10 | 1.36±0.07 | 1.64±0.07 | 1.71±0.08 |
| Total P (g/kg dw) | 0.88±0.05 | 0.64±0.04 | 0.43±0.03 | 0.61±0.05 |
| Total K (g/kg dw) | 15.07±1.18 | 12.95±0.84 | 11.16±0.77 | 10.08±0.71 |
| Pesticides (µg/kg dw) | 0 | Chlorpyrifos: 88.4±4.6  Thiobencarb: 37.4±3.1 | 0 | Chlorpyrifos: 53.3±3.6  Propanil: 21.2±1.9  Endosulfans: 14.6±1.1 |

**Table 2S**. Intermediate metabolites with their chemical formula, molecular weight and LC-MS values formed during chlorpyrifos degradation by *Bacillus*, *Cupriavidus* and anaerobic degrading bacteria.

| Bacteria | Intermediate Metabolite | Chemical formula | Molecular weight (g/mol) | m/z M or [M*–*H]*–* |
| --- | --- | --- | --- | --- |
| Aerobic condition | | | | |
| *Bacillus* and *Cupriavidus* | 3,5,6-trichloro-2-pyridinol (TCP) | C5H2Cl3NO | 198.43 | 197 |
| Diethyl thiophosphate | C4H11O3PS | 170.17 | 169 |
| *Bacillus* | 5,6-Dihydro-2(1H)-pyridinone | C5H7NO | 97.12 | 95 |
| Cupriavidus nantongensis X1 | 3,6-dihydroxypyridine-2,5-dione | C5H3NO4 | 141.0 | 140 |
| Anaerobic condition | | | | |
| Mixed culture | 3,5,6-trichloro-2-pyridinol (TCP) | C5H2Cl3NO | 198.43 | 197 |
| Diethyl thiophosphate | C4H11O3PS | 170.17 | 169 |
| 5,6-dichloro-2-pyridinol | C5H3Cl2NO | 163.99 | 162 |
| 2-pyridinol | C5H5NO | 95.10 | 94 |
| Fumaric acid | C4H4O4 | 116.07 | 115 |


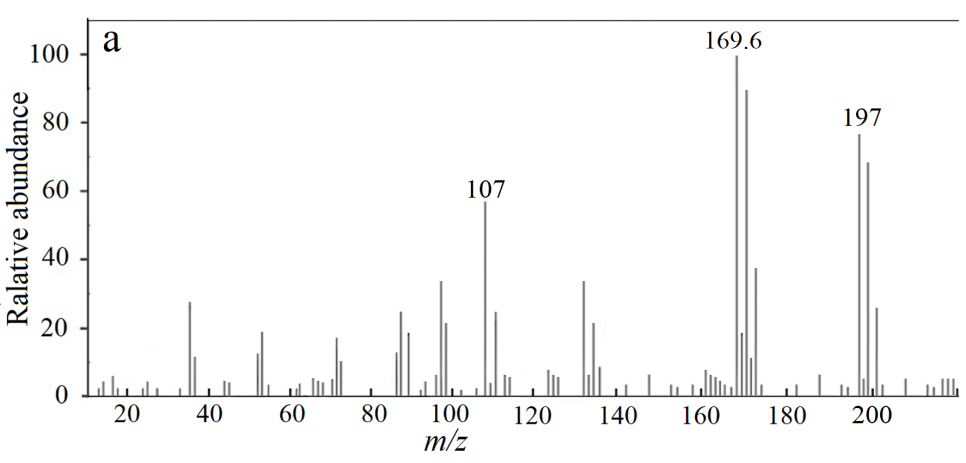


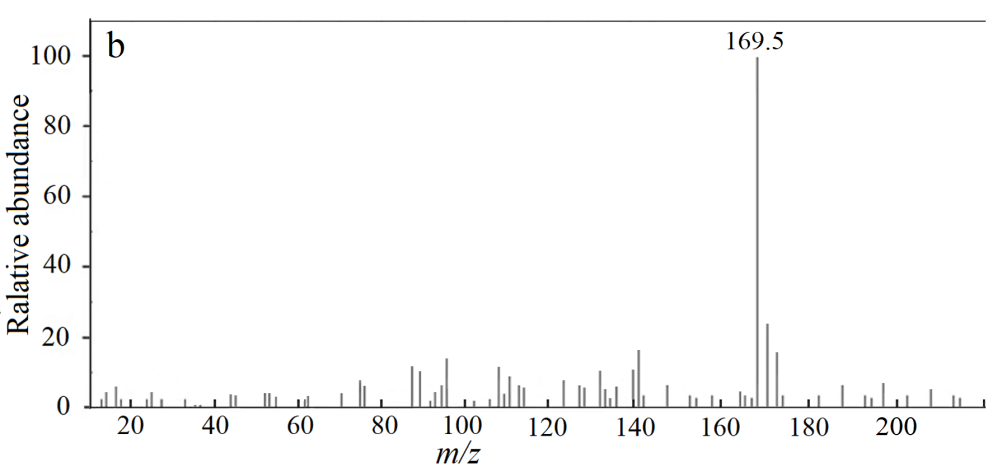


**Figure 1S**. LC–MS spectra of (a) 3,5,6-Trichloro-2-pyridinol and (b) di-ethylthiophosphate during biodegradation of chlorpyrifos by *Bacillus*, *Cupriavidus* and anaerobic degrading mixed culture.
